# Supplementary material for: The importance of the nutritive value of old bones in the diet of Bearded vultures Gypaetus barbatus
Source: PubMed Central journal article supplement (PMC5556076; doi:10.1038/s41598-017-08812-2), 2017-08-14
Supplement: 41598_2017_8812_MOESM1_ESM.pdf [file 41598_2017_8812_MOESM1_ESM.pdf]

## Supplementary Information

### The importance of the nutritive value of old bones in the diet of Bearded vultures *Gypaetus barbatus*

Antoni Margalida<sup>1,2</sup>, Daniel Villalba<sup>1</sup>

<sup>1</sup> Department of Animal Science, Faculty of Life Sciences and Engineering, University of Lleida, 25198 Lleida, Spain. Tel: (+34) 973 003 721. E-mail: amargalida@ca.udl.cat

<sup>2</sup> Division of Conservation Biology, Institute of Ecology and Evolution, University of Bern. CH-3012. Bern, Switzerland.

Table S1. Chemical composition values of bone according to species, preservation time and anatomical part.

| Sample id | Species             | Preservation | Anatomical | Ashes      | Fat        | Protein    | DM     |
|-----------|---------------------|--------------|------------|------------|------------|------------|--------|
| 22        | Ovis aries          | dry          | femur      | 71.8788306 | 0.1108281  | 26.9844986 | 90.532 |
| 112       | Ovis aries          | fresh        | femur      | 54.8159291 | 13.5108433 | 30.9319164 | 52.068 |
| 113       | Ovis aries          | fresh        | tibia      | 57.8712388 | 12.2569111 | 28.5480856 | 66.175 |
| 114       | Ovis aries          | fresh        | tibia      | 57.4303536 | 13.6600074 | 27.3457232 | 66.172 |
| 56        | Sus scrofa var. dom | dry          | scapula    | 63.6159666 | 0.33883038 | 29.29263   | 97.829 |
| 61        | Sus scrofa var. dom | dry          | femur      | 66.3501699 | 0.77604956 | 24.8367321 | 97.724 |
| 70        | Sus scrofa var. dom | dry          | tibia      | 67.43301   | 0.160305   | 28.2823173 | 98.214 |
| 122       | Sus scrofa var. dom | fresh        | femur      | 41.9264388 | 32.7466968 | 25.1219446 | 67.76  |
| 116       | Sus scrofa var. dom | fresh        | scapula    | 38.6681131 | 23.4533145 | 36.1104604 | 54.86  |
| 126       | Sus scrofa var. dom | fresh        | tibia      | 44.1685674 | 23.860375  | 28.7258791 | 70.99  |
| 121       | Sus scrofa var. dom | fresh        | femur      | 41.1537623 | 31.7034167 | 24.5288136 | 68.85  |
| 93        | Ovis aries          | dry          | femur      | 68.2483977 | 0.24594404 | 30.0652878 | 91.83  |
| 115       | Sus scrofa var. dom | fresh        | scapula    | 43.6324493 | 22.0404344 | 33.7967002 | 57.34  |
| 127       | Sus scrofa var. dom | fresh        | tibia      | 45.8106108 | 25.5942575 | 28.5332751 | 66.62  |
| 67        | Sus scrofa var. dom | dry          | tibia      | 66.8346373 | 0.55951082 | 26.1169655 | 91.235 |
| 57        | Sus scrofa var. dom | dry          | scapula    | 64.0799015 | 0.46970201 | 30.5649895 | 92.199 |
| 60        | Sus scrofa var. dom | dry          | femur      | 67.1973131 | 0.41071424 | 25.6557159 | 92.365 |
| 87        | Ovis aries          | dry          | scapula    | 66.867676  | 0.1449802  | 29.6752028 | 91.366 |
| 27        | Ovis aries          | dry          | tibia      | 71.5480687 | 0.0625919  | 27.9369353 | 92.719 |
| 90        | Ovis aries          | dry          | tibia      | 72.8876901 | 0.05016662 | 27.2934454 | 92.557 |

|     |            |       |         |            |            |            |        |
|-----|------------|-------|---------|------------|------------|------------|--------|
| 7   | Ovis aries | dry   | scapula | 67.0962148 | 0.08292337 | 31.3038484 | 93.546 |
| 109 | Ovis aries | fresh | scapula | 53.8333819 | 4.11468775 | 40.9284909 | 53.036 |
| 110 | Ovis aries | fresh | scapula | 56.5236948 | 3.7177413  | 37.9180104 | 54.173 |
| 111 | Ovis aries | fresh | femur   | 54.1666329 | 12.7692992 | 31.2532477 | 53.038 |

---
